# Supplementary material
Source: PubMed Central journal article supplement (PMC7378873)
Supplement: jamaoncol-e202535-s002.pdf [file jamaoncol-e202535-s002.pdf]

## Supplementary Online Content

I-SPY2 Trial Consortium. Association of event-free and distant recurrence-free survival with individual-level pathologic complete response in neoadjuvant treatment of stages 2 and 3 breast cancer: three-year follow-up analysis for the I-SPY2 adaptively randomized clinical trial. *JAMA Oncol*. Published online July 23, 2020. doi:10.1001/jamaoncol.2020.2535

### **eMethods.**

**eFigure 1.** I-SPY2 study schema, illustrating multiple experimental arms compared with a common control, adaptive randomization and schedule of assessments.

**eFigure 2.** Kaplan-Meier survival curves for Event-free Survival for each molecular subtype.

**eFigure 3.** Kaplan-Meier survival curves Distant Relapse-free Survival for each molecular subtype.

**eFigure 4.** Forest plot showing Bayesian modeled EFS hazard ratios by pCR vs non-pCR for each therapy, adjusting for molecular subtype.

**eFigure 5.** Trends in use of adjuvant therapy in patients with residual disease following neoadjuvant treatment and surgery since I-SPY2 opened in 2010. over time in I-SPY2.

**eTable 1.** Baseline characteristics of participants in the analysis set who achieved pCR prior to surgery and those with residual disease at surgery.

**eTable 2.** Use of adjuvant therapy in the I-SPY2 population, by subtype and pCR result.

This supplementary material has been provided by the authors to give readers additional information about their work.

## eMethods.

Bayesian modeling of EFS hazard ratio for pCR vs. non-pCR, adjusting for subtype.

We assume that EFS is exponentially distributed for both achieving pCR and not achieving pCR. The hazard rate is a function of subtypes defined by HR/HER2 status and treatment arm.

We denote the hazard rate of events for a non-pCR within patient subtype  $s$  by  $\lambda_s$ . The event hazard rate for a pCR on arm  $a$  in subtype  $s$  is assumed to be  $\exp(\theta_a) \lambda_s$ . In this parameterization, parameter  $\theta_a$  is the log of the hazard ratio for achieving pCR on arm  $a$ ; and is assumed to depend on treatment arm, but the same for each of the 4 subtypes.

The prior distribution for each of the hazard rate for non-pCR is a gamma distribution that is approximately non-informative:

$$\lambda_s \sim \text{gamma}(0.01, 0.01), \quad s = 1, 2, 3, 4$$

The prior distribution for each of the log-hazard ratios is standard normal:

$$\theta_a \sim N(0, 1), \quad a = 1, \dots, 10$$

We update this distribution based on the data within each of the 10 treatment arms considered separately. Calculation method is Markov chain Monte Carlo (MCMC) with 50,000 observations and a burn-in of 10,000. The 10 posterior distributions (for  $\exp(\theta_a)$ ) are summarized in a forest plot in Supplemental Figure 4, where the solid rectangle is the distribution's median and the horizontal line extends from lower to upper 2.5 percentiles.

**eFigure 1.** I-SPY2 study schema, illustrating multiple experimental arms compared with a common control, adaptive randomization and schedule of assessments.

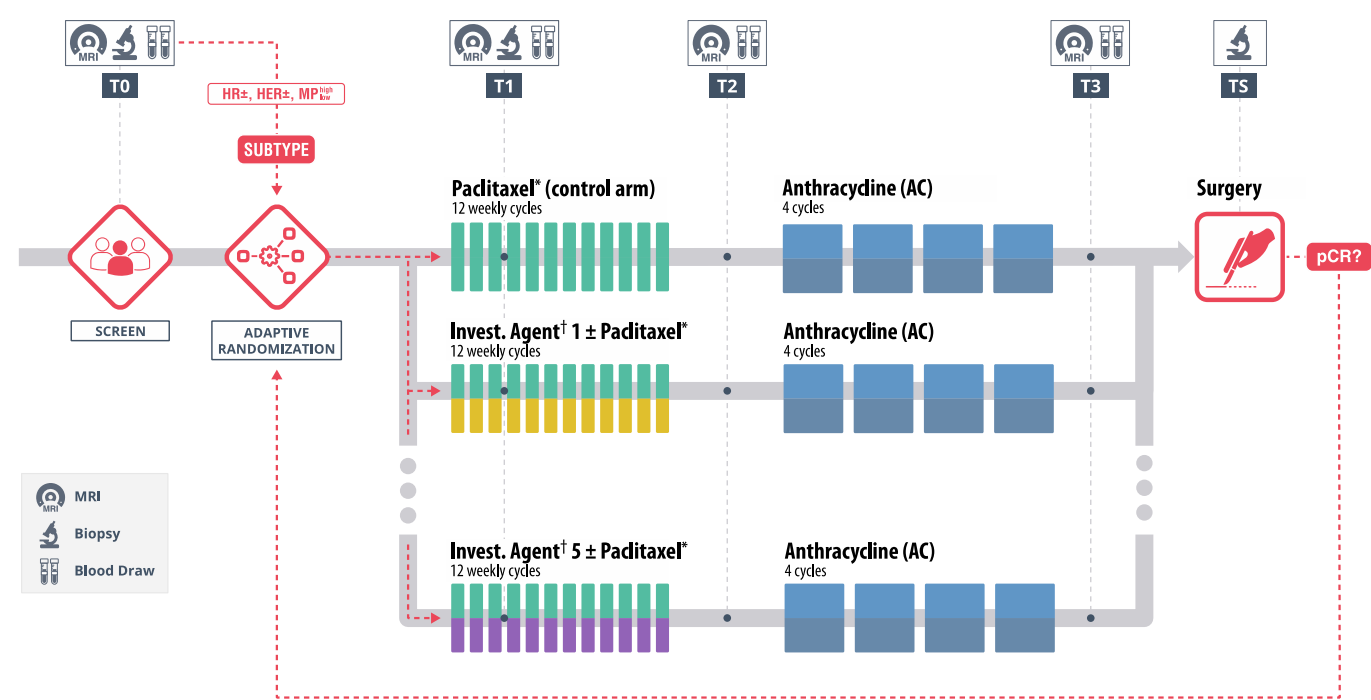

\* Patients who are HER2+ may also receive trastuzumab (Herceptin)  
† An investigational combination of one or more agents may be used to replace all or some of the standard therapy

**eFigure 2.** Kaplan-Meier survival curves for Event-free Survival for each molecular subtype.

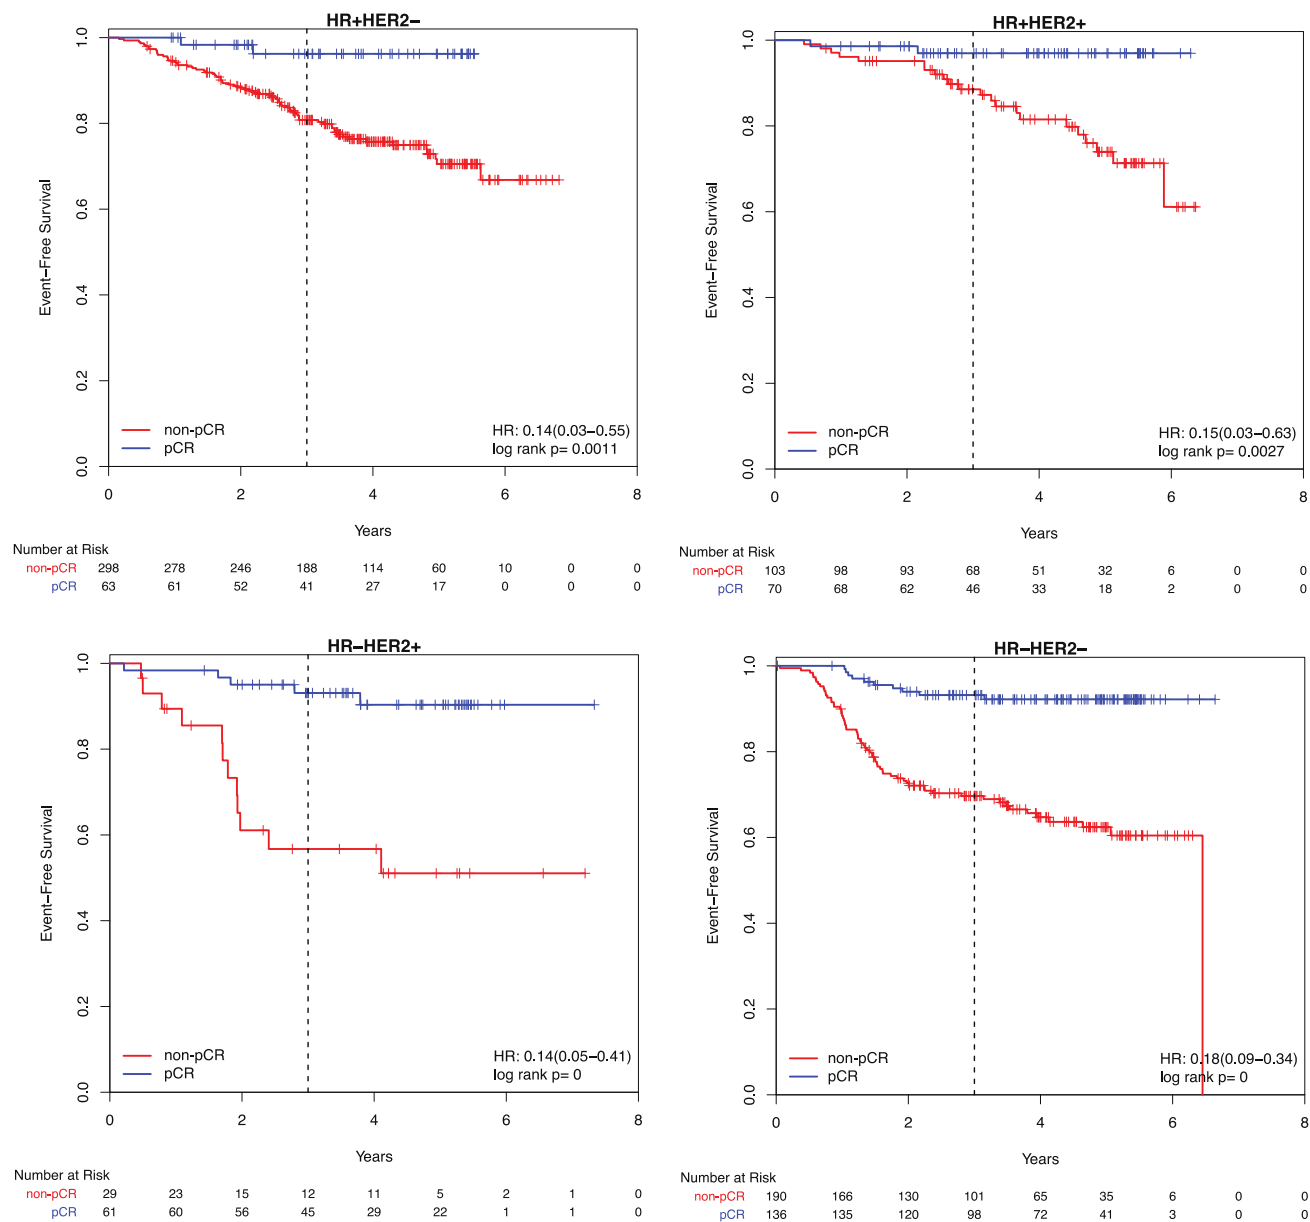

**eFigure 3.** Kaplan-Meier survival curves Distant Relapse-free Survival for each molecular subtype.

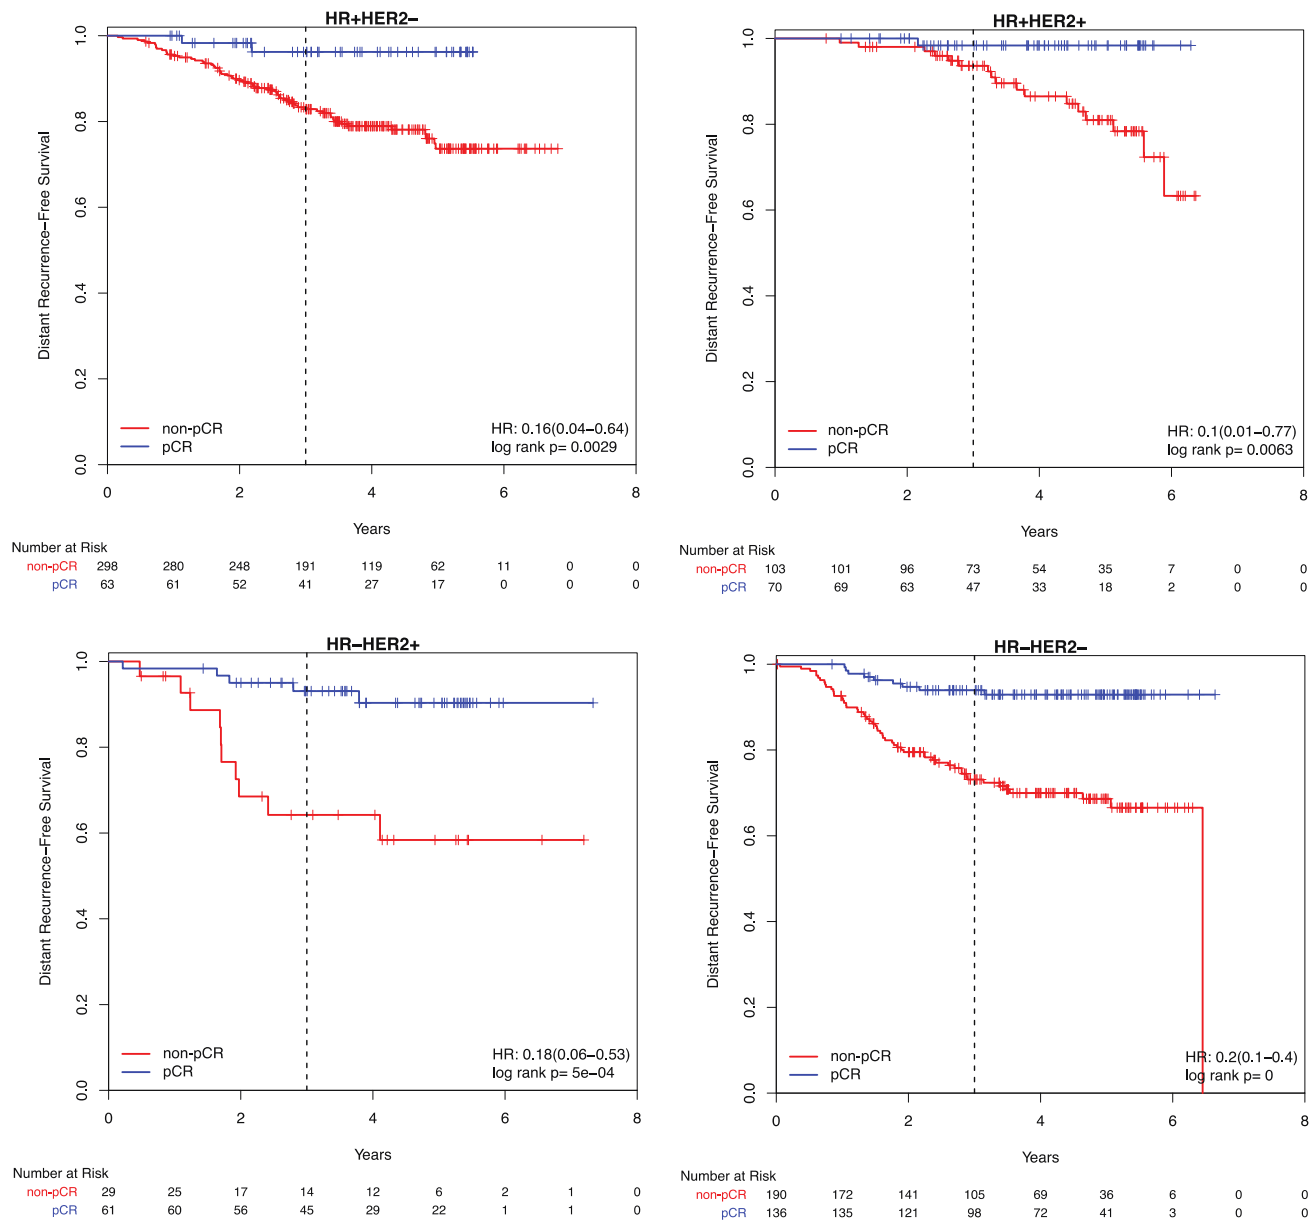

**eFigure 4.** Forest plot showing Bayesian modeled EFS hazard ratios by pCR vs non-pCR for each therapy, adjusting for molecular subtype. The solid rectangle is the median of exponent of the posterior distribution of log-hazard ratio in each treatment arm and the horizontal line extends from lower to upper 2.5 percentiles. Therapies are organized into 3 groups: control, those that did not graduate and those that did.

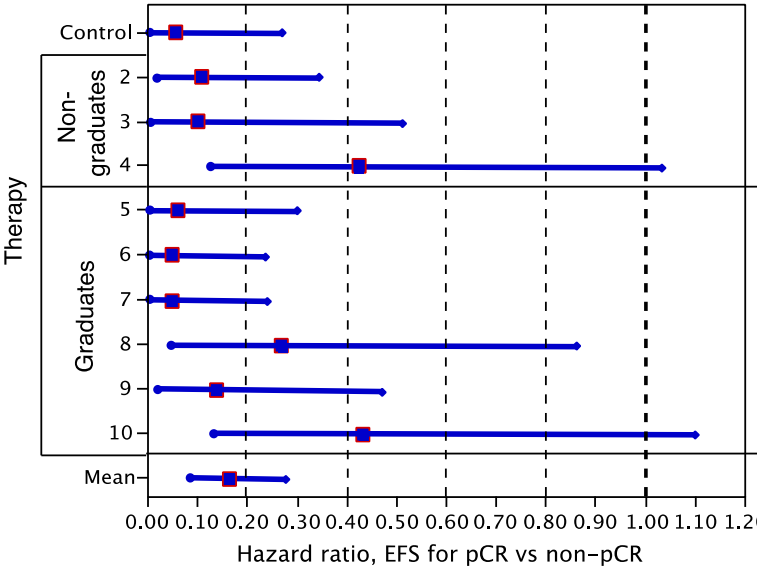

**eFigure 5.** Trends in use of adjuvant therapy in patients with residual disease following neoadjuvant treatment and surgery since I-SPY2 opened in 2010. over time in I-SPY2. Adjuvant treatment is not mandated, rather left to the discretion of the treating physician in I-SPY2.

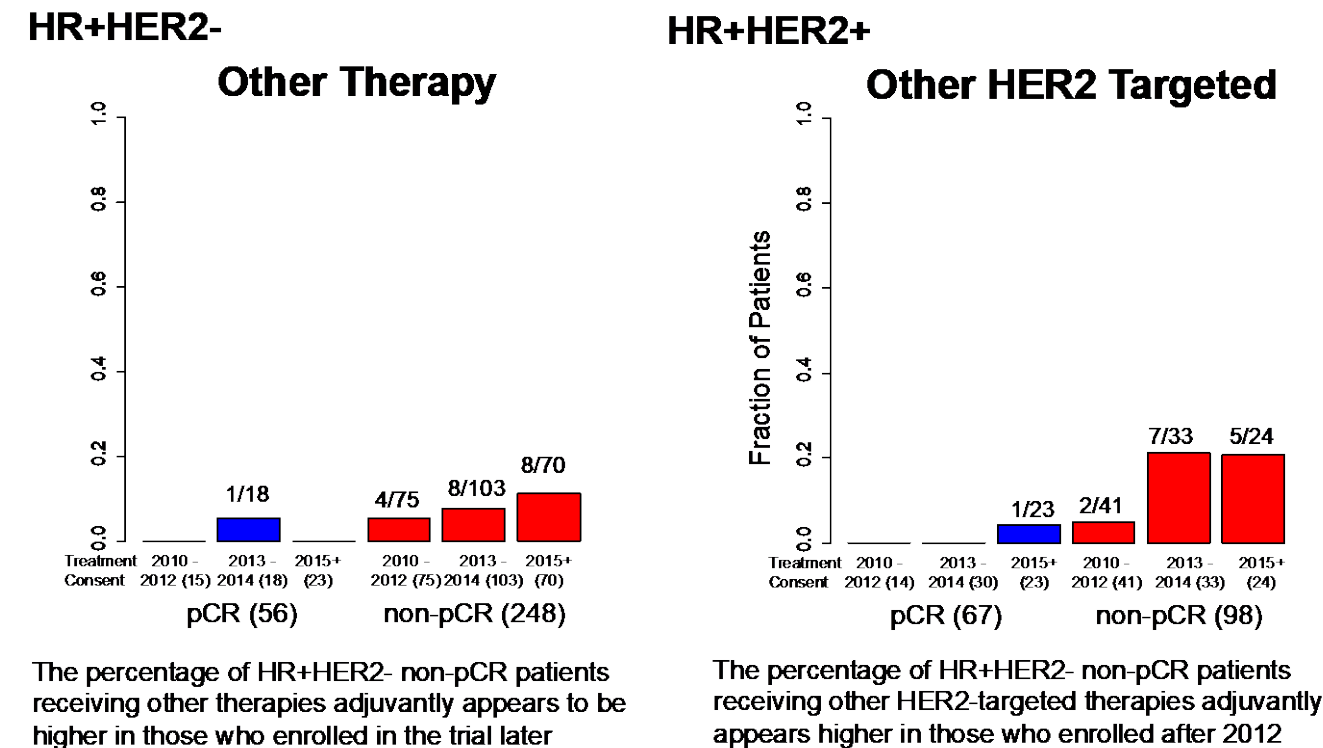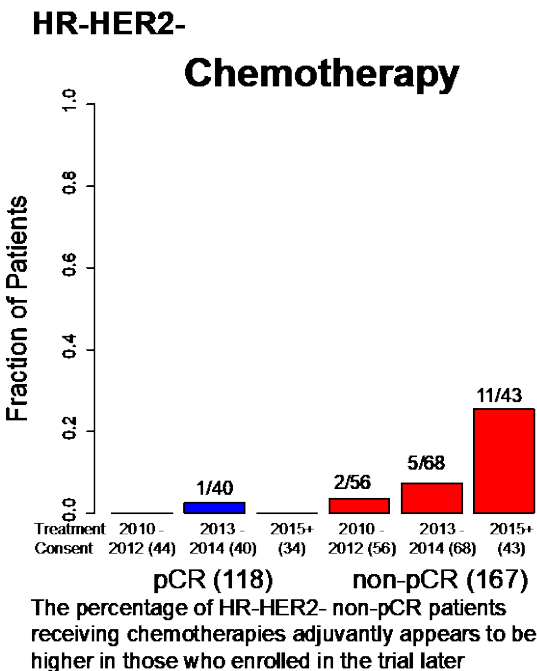

**eTable 1.** Baseline characteristics of participants in the analysis set who achieved pCR prior to surgery and those with residual disease at surgery.

|                                        | pCR (n=330)     | No pCR (n=620)  | p       |
|----------------------------------------|-----------------|-----------------|---------|
| Age                                    |                 |                 | 0.5947  |
| Median (Range)                         | 49 (25 - 73)    | 49 (23 - 77)    |         |
| Race                                   |                 |                 | 0.9814  |
| White                                  | 266 (81%)       | 493 (80%)       |         |
| Black or African American              | 35 (11%)        | 73 (12%)        |         |
| Asian                                  | 23 (7%)         | 44 (7%)         |         |
| Native Hawaiian or Pacific Islander    | 2 (1%)          | 3 (0%)          |         |
| American Indian or Alaska Native       | 1 (0%)          | 3 (0%)          |         |
| Mixed Race                             | 3 (1%)          | 4 (1%)          |         |
| Ethnicity                              |                 |                 | 0.0213  |
| Hispanic or Latino                     | 46 (14%)        | 55 (9%)         |         |
| Not Hispanic or Latino                 | 284 (86%)       | 565 (91%)       |         |
| HR status                              |                 |                 | <0.0001 |
| HR-negative                            | 197 (60%)       | 219 (35%)       |         |
| HR-positive                            | 133 (40%)       | 401 (65%)       |         |
| HER2 status                            |                 |                 | <0.0001 |
| HER2-negative                          | 199 (60%)       | 488 (79%)       |         |
| HER2-positive                          | 131 (40%)       | 132 (21%)       |         |
| Pre-treatment longest diameter by MRI* |                 |                 | <0.0001 |
| Median (Range)                         | 3.7 (0.44-14.7) | 3.9 (0.8 - 22)  |         |
| Palpable Nodes                         |                 |                 | 0.3212  |
| No                                     | 173 (52%)       | 305 (49%)       |         |
| Yes                                    | 108 (33%)       | 233 (38%)       |         |
| Missing                                | 49 (15%)        | 82 (13%)        |         |
| Time to Surgery, days                  |                 |                 | 0.9249  |
| Median (Range)                         | 169 (97 - 265)  | 169 (64 - 351)  |         |
| Length of Follow-up, years             |                 |                 | 0.0611  |
| Median (Range)                         | 4.0 (0.8 – 7.3) | 3.7 (0.2 - 7.6) |         |



**eTable 2.** Use of adjuvant therapy in the I-SPY2 population, by subtype and pCR result.

|                                    | <b>HR+HER2- (n=304)</b> |                          | <b>HR+HER2+ (n=165)</b> |                         | <b>HR-HER2- (n=285)</b> |                          | <b>HR-HER2+ (84)</b> |                         |
|------------------------------------|-------------------------|--------------------------|-------------------------|-------------------------|-------------------------|--------------------------|----------------------|-------------------------|
|                                    | <b>pCR<br/>(56)</b>     | <b>non-pCR<br/>(248)</b> | <b>pCR<br/>(67)</b>     | <b>non-pCR<br/>(98)</b> | <b>pCR<br/>(118)</b>    | <b>non-pCR<br/>(167)</b> | <b>pCR<br/>(57)</b>  | <b>non-pCR<br/>(27)</b> |
| <b>Endocrine Therapy*</b>          | 50 (89%)                | 209 (84%)                | 61 (91%)                | 91 (93%)                | 5 (4%)                  | 16 (10%)                 | 4 (7%)               | 4 (15%)                 |
| <b>Trastuzumab</b>                 | 1 (2%)                  | 5 (2%)                   | 60 (90%)                | 83 (85%)                | 0 (0%)                  | 5 (3%)                   | 53 (93%)             | 23 (85%)                |
| <b>Other HER2-Targeted Therapy</b> | 0 (0%)                  | 3 (1%)                   | 1 (1%)                  | 14 (14%)                | 1 (1%)                  | 2 (1%)                   | 1 (2%)               | 1 (4%)                  |
| <b>Chemotherapy</b>                | 0 (0%)                  | 11 (4%)                  | 1 (1%)                  | 7 (7%)                  | 1 (1%)                  | 18 (11%)                 | 0 (0%)               | 0 (0%)                  |
| <b>Other Therapy</b>               | 1 (2%)                  | 20 (8%)                  | 1 (1%)                  | 5 (5%)                  | 3 (3%)                  | 7 (4%)                   | 0 (0%)               | 0 (0%)                  |
