# Supplementary material
Source: PubMed Central journal article supplement (PMC7378873)
Supplement: jamaoncol-e202535-s003.pdf [file jamaoncol-e202535-s003.pdf]

# Data Sharing Statement

Yee. Association of Event-Free and Distant Recurrence-Free Survival With Individual-Level Pathologic Complete Response in Neoadjuvant Treatment of Stages 2 and 3 Breast Cancer. *JAMA Oncol*. Published July 23, 2020. 10.1001/jamaoncol.2020.2535

## Data

**Data available:** Yes

**Data types:** Other (please specify)

**Additional Information:** Locked analysis data set

**How to access data:** Upon request and approval of a submitted proposal

**When available:** With publication

## Supporting Documents

**Document types:** None

## Additional Information

**Who can access the data:** researchers whose proposed use of the data has been approved

**Types of analyses:** Biomarker, meta-analyses, other

**Mechanisms of data availability:** without investigator support, after approval of a proposal and with a signed data access agreement
